# Supplementary material
Source: Springer Nature journal article supplement (https://www.springermedizin.de/resource/supplementary/12885_2010_2522_MOESM3_ESM.pdf/9461946)
Supplement: MOESM3 [file 9461946]

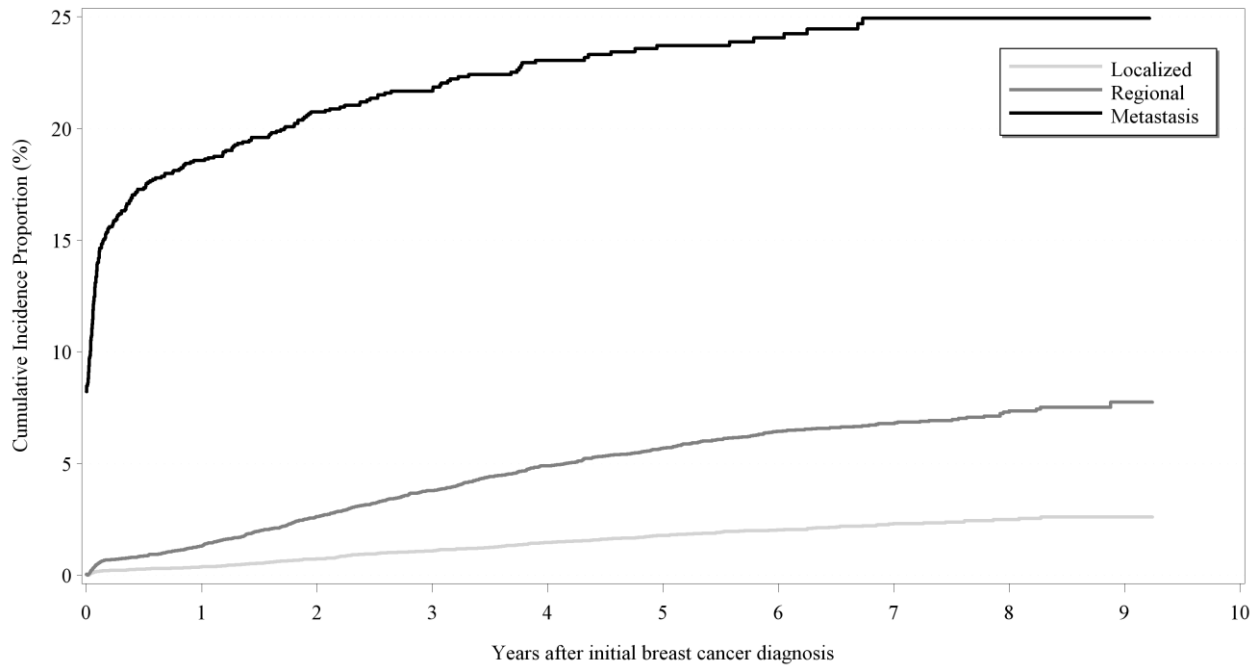

| Stage             | 1-year incidence of bone metastasis<br>(95% CI) | 3-year incidence of bone metastasis<br>(95% CI) | 5-year incidence of bone metastasis<br>(95% CI) |
|-------------------|-------------------------------------------------|-------------------------------------------------|-------------------------------------------------|
| <b>Localized</b>  | 0.4%<br>(0.3% - 0.5%)                           | 1.1%<br>(0.9% - 1.3%)                           | 1.8%<br>(1.5% - 2.0%)                           |
| <b>Regional</b>   | 1.3%<br>(1.1% - 1.5%)                           | 3.8%<br>(3.5% - 4.1%)                           | 5.7%<br>(5.3% - 6.2%)                           |
| <b>Metastasis</b> | 18.6%<br>(16.7% - 20.5%)                        | 21.7%<br>(19.6% - 23.8%)                        | 23.7%<br>(21.5% - 26.0%)                        |
